1 Title: The dark side of streaking: Examining the backfire potential of run streaking in  
2 recreational runners who broke a long-term streak.

3

4 Short Title: Backfire potential of run streaking

5

6 <sup>1</sup>Erin E. Ingalls, <sup>1</sup>Nicholas Larade, <sup>2</sup>Gozde Ozakinci, <sup>1</sup>Gabriela Tymowski-Gionet, <sup>3</sup>Lena Fleig,

7 <sup>1,2</sup>Stephan U. Dombrowski

8

9 <sup>1</sup> Faculty of Kinesiology, University of New Brunswick, Canada

10 <sup>2</sup> Division of Psychology, University of Stirling, Scotland

11 <sup>3</sup> Department of Psychology, Medical School Berlin, Germany

12

13 **Correspondence:**

14 Stephan U. Dombrowski

15 90 Mackay Drive

16 Fredericton, New Brunswick,

17 Canada, E3B 5A3

18 Phone: (506) 453-4803

19 Email: [stephan.dombrowski@unb.ca](mailto:stephan.dombrowski@unb.ca)

21 **ABSTRACT**

22

23 **Background:** Run streaking is running on consecutive days for a minimum of one mile per day.  
24 Despite its benefits for supporting habit formation and long-term behaviour change, some streak  
25 runners report potential unintended negative consequences of run streaking. The aim of the study  
26 is to examine the backfire potential of run streaking in recreational runners who ended a long-  
27 term streak.

28 **Methods:** Qualitative semi-structured interviews with 17 recreational adult runners (10 male, 6  
29 female, 1 other gender). All runners ended a run streak of  $\geq 100$  consecutive days. Transcripts  
30 were analyzed using a hybrid deductive–inductive thematic analysis.

31 **Results:** Prior to streak cessation, some runners felt streak-related inconveniences and ran with  
32 injury to prolong the streak. Immediate consequences following the end of a streak included  
33 feelings of sadness, anger, disappointment and relief. Several run streakers described a ‘grieving  
34 process’ in the weeks and months following streak cessation. Unintended negative consequences  
35 were amplified in runners with higher levels of streak attachment. All physically capable runners  
36 continued to run regularly with most starting a new streak and all voiced positive views towards  
37 run streaking despite their streak ending.

38 **Conclusion:** Run streaking as a behaviour change technique has small backfire potential in some  
39 runners. Ending a long-term run streak can lead to short-term negative affect which can develop  
40 into experiences of grief, particularly in those with high levels of streak attachment. No long-  
41 term negative consequences were reported. All participants perceived run streaking as positive  
42 overall and remained physically active following the end of their long-term streak.

43 **Keywords:** Streaking, behaviour change technique, backfire potential, running, physical activity

## 44 INTRODUCTION

45 Regular engagement in physical activity leads to mental and physical benefits and supports the  
46 primary and secondary prevention of various chronic diseases such as diabetes mellitus, cancer,  
47 obesity, hypertension, and depression (1, 2). The Canadian 24-Hour Movement Guidelines  
48 suggest that adults engage in 150 minutes of aerobic moderate-to-vigorous intensity physical  
49 activity each week (3). However, despite the well-documented benefits of regular physical  
50 activity, many people do not meet these guidelines. In Canada, for example, 51% of Canadians  
51 have been estimated to not accumulate 150 minutes of physical activity per week (4). A potential  
52 aerobic physical activity behaviour that can help individuals reach physical activity guidelines is  
53 running.

54 Running is the most fundamental vigorous-level activity and benefits overall physical and mental  
55 health (5). A systematic review of 14 studies from six prospective cohorts with a pooled sample  
56 of 232,149 participants found that running participation was associated with 27%, 30%, and 23%  
57 lower risk of all-cause, cardiovascular, and cancer mortality, respectively, compared to no  
58 running (6). A large prospective cohort study on running and longevity examined 55,137 adults  
59 over a 15 year average follow-up period estimated that runners (approximately 24% of the  
60 cohort) lived an average of three years longer than non-runners (7). Moreover, a longitudinal  
61 study of 244 recreational runners that examined the relationship between running and  
62 psychological wellbeing (8) found that runners thought better about themselves and their lives,  
63 and the better they felt affectively, the more frequently they ran and the more distance they ran  
64 during a week. Frequency of running seemed a more reliable predictor of well-being than the  
65 distance covered, suggesting that regular running episodes might benefit psychological wellbeing  
66 in runners.

67 Sustained physical activity performance is required to obtain and maintain the health benefits  
68 associated with being active. However, running cessation is common in recreational runners (9).  
69 According to a prospective cohort study including 774 participants, lack of motivation and injury  
70 are common variables associated with the discontinuation of running (10). Conversely, self-  
71 regulation skills and intrinsic motives were reported as key antecedents of running behaviour in a  
72 systematic review including 58 studies that examine psychological correlates of recreational  
73 running (11). A longitudinal qualitative study of 20 new runners identified that having a  
74 meaningful reason to run (such as those related to identity, values, special memories,  
75 relationships, enjoyment or a personal goal) and experiencing progress as important for  
76 maintaining running behaviour for 6 to 12 months (12).

77 The development of habits has been theorized to play a significant role in maintaining behaviour  
78 change (13). Repetition is a central component in the formation of habits (14). It has been  
79 estimated that habit formation takes an average of 66 days, with a range of 18-254 days (15) and  
80 repetition has been theorised as a key component to support the formation of habits particular in  
81 the early days of habit formation (16, 17). Engaging in a behaviour frequently—such as every  
82 day—facilitates repetition and habit formation.

83 Behavioural streaking is the performance of a pre-specified behaviour consecutively in regular  
84 intervals—usually daily—without taking a break, while tracking the number of repeated  
85 performances. Streaking as a behavior change technique has been examined in the context of  
86 marketing (18-20), but research on behavioural streaking within the health context is rare.

87 Despite its frequent use in the general population and within marketing contexts, behavioural  
88 streaking as a technique is absent from the behaviour change technique (BCT) taxonomies, lists,  
89 and compendiums (21-24).

90 The application of behavioural streaking within the recreational running is typically defined as  
91 running on consecutive days for a minimum period of time or distance: typically at least one mile  
92 (1.61 kilometres), at any pace, at any place, and monitoring the number of days (25). Several  
93 recreational runners have adopted this technique and report successfully maintaining their daily  
94 running behaviour. Recent research examined run streaking as a BCT in recreational runners  
95 (26). The qualitative study including 21 recreational runners reported that run streaking may lead  
96 to habit formation of running behaviour. Run streaking was found to engage a variety of  
97 additional psychological mechanisms which support sustained behavioural performance over  
98 time, such as motivation, self-regulation, and identity. However, some runners reported  
99 unintended consequences of using this technique such as injury or stress.

100 Behaviour change interventions have the potential to lead to unintended negative consequences,  
101 sometimes referred to as a backfire (27). Potential unintended negative consequences of BCTs  
102 need to be understood to ensure an awareness of their inherent ‘backfire potential’ when using a  
103 technique. Backfire potential may be conceptualised as the likelihood of technique engagement  
104 leading to unintended negative consequences across different behaviours, populations, and  
105 contexts. Frameworks conceptualising how interventions targeting behaviour and behaviour-  
106 related change may lead to unintended negative consequences have been proposed (28, 29). The  
107 compendium of self-enactable techniques lists 123 techniques, with seven techniques  
108 accompanied by expert generated suggestions on ‘possible adverse effects’ (21). For example,  
109 the technique ‘behavioral goal setting’ was accompanied by the mentioning of the possible  
110 adverse effect that failure to achieve goals may reduce feelings of competence and lead to  
111 disappointment. A better understanding of potential unintended negative consequences of  
112 techniques might help successful technique implementation and avoid BCT backfiring.

113 Based on previous streaking research (26) it can be hypothesised that streaking in the context of  
114 running might backfire in three areas leading to potential unintended negative consequences.  
115 First, run streaking might lead to health compromising effects such as increasing of  
116 psychological stress, or worsening of injury or lack of recovery from physical or mental  
117 challenges which may or may not be related to running. Second, the cessation of a run streak  
118 might negatively impact psychological wellbeing particularly for those run streakers who  
119 accumulated a run streak over several months and/or years. Third, run streak cessation might  
120 lead to an abandoning of running behaviour specifically or physical activity in general if the  
121 motive of behavioural engagement is solely motivated by upholding the streak.  
122 The overall aim of this study is to examine the backfire potential of using run streaking as a BCT  
123 with a focus on recreational runners who ended a long-term run streak, as this population is most  
124 likely to have experienced potential unintended negative consequences of run streaking. The  
125 specific objectives were to i) explore perceptions during the lead up period prior to streak  
126 cessation, ii) reflect on the immediate consequences of run streak cessation, and iii) examine  
127 longer-term consequences of run streak cessation.

128

## 129 **METHODS**

### 130 *Study Design*

131 This study used a qualitative design. Data were collected between 13. November and 19  
132 December 2023 through 17 semi-structured interviews with recreational streak runners who  
133 identified as male (n=10), female (n=6) and another gender (not disclosed to preserve anonymity,  
134 n=1) who ended a run streak of a minimum of 100 days. Interviews were conducted online,  
135 averaging 28.4 minutes in length (range = 16- 52 min). Interviews were conducted by a

136 researcher (EI) and supervised by a health psychologist (SD). Following verbal consent, each  
137 interview was recorded, transcribed, and anonymized prior to analysis. This study received  
138 approval from the University of New Brunswick Research Ethics Board and is on file as REB  
139 2023-12B.

140

#### 141 ***Inclusion Exclusion Criteria***

142 Participants were eligible for the study based on three criteria. Individuals were recruited who 1)  
143 were 19 years of age or older, 2) had completed a minimum of a 100-day streak (defined as  
144 running a minimum of one mile every day), which ended by choice or circumstance, and 3) were  
145 a recreational runner (i.e. not being paid for their running activities). There were no geographical  
146 restrictions as interviews were conducted virtually. Interviews were completed in English; thus,  
147 the ability to communicate in English was required for participation.

148

#### 149 ***Recruitment***

150 Participants were recruited using an online flyer posted to a streak running Facebook group. The  
151 poster included a large title reading “Have you ever broken your run streak?” as well as the list  
152 of inclusion and exclusion criteria. Individuals interested in volunteering were encouraged to  
153 reach out to a member of the research team via Facebook or the email provided.

154

#### 155 ***Procedures***

156 This project used a qualitative approach by interviewing recreational runners who had previously  
157 used the technique of run streaking. Interviews were conducted using Microsoft Teams or Zoom  
158 (participant preference). Prior to the interview, participants received an email containing

159 information on the purpose and methods of the study. During the interview, participants were re-  
160 read the information contained in the email. Verbal consent was obtained from the individual for  
161 their participation in the study. Pre-selected interview questions remained consistent between  
162 each participant, and demographics were taken in the end (see Appendix A for the topic guide).

163

#### 164 *Analysis*

165 Interview transcriptions were anonymized and underwent abductive thematic analysis (30),  
166 moving between inductive and deductive coding (31) using Atlas.ti. This allowed for the  
167 construction of unanticipated themes and knowledges, as well as exploration through established  
168 temporal concepts (i.e. lead-up period prior to the streak ending; immediate consequences of the  
169 run streak ending; and longer-term consequences following the ending of the run streak).

170 Transcripts were first coded by one author using a deductive approach in line with the pre-  
171 specified research objectives based on broad general temporal sequence of the phenomenon  
172 under investigation and its inherent psychological processes.

173 Within the broad inductive temporal focus, codes were generated inductively to identify  
174 additional themes. Coding included identification of additional themes, which were discussed by  
175 the research team, defined, and refined. All codes were checked by a health psychologist (SD) to  
176 ensure that the transcriptions were consistently coded, as part of regular meetings during the  
177 analysis phase and discussed among the research team.

178 All interviews were conducted by a research student (EI) who did not engage in streak running at  
179 the time of interviews. This allowed participants to elaborate on their run streaking views and  
180 experiences in detail without assuming prior knowledge of the interviewer. The research team  
181 consisted of individuals who identified as runners without engaging in streak running (GO,



182 GTG) streak runners (NL, SD), and those who identified as a physical activity streak in a  
183 different domain (i.e. yoga)/ (LF).

184

## 185 **RESULTS**

### 186 *Participants*

187 Seventeen runners (10 male, 6 female, 1 other gender) participated in this study (see Table 1).

188 Participants were aged 20-29 (n=1), 30-39 (n=2), 40-49 (n=6), 50-59 (n=2), 60-69 (n=4), and

189 70+ (n=2). Based on self-reported height and weight, participants were placed into BMI

190 categories: 18.5-24.9 (n=9), 25-29.9 (n=7), and 30-39.9 (n=1). Participants reported their marital

191 status as being married (n=11), in a partnership (n=3), or single (n=3) and most came from the

192 USA (n=11), followed by Canada (n=5), and Scotland (n=1). Ethnicities were reported as

193 Caucasian (n=16) and Chinese (n=1) and participants were employed (n=12), unemployed (n=1),

194 or retired (n=4).

195 Runners reported a range of general running experiences, including between 5-10 years (n=3),

196 11-15 years (n=3), 16-20 years (n=4), 21-30 years (n=3), and 40+ years (n=4). The length ranges

197 of the broken streak were 100-365 days (n=2), 366-500 days (n=2), 501-1000 days (n=4), 1001-

198 2000 days (n=5), 2001-3000 days (n=1), 3001-5000 days (n=1), 5000+ days (n=1) and unknown

199 (n=1).

200 --- Table 1 about here please ---

### 201 *Introduction of Themes and sub-themes*

202 Figure 1 outlines the themes and sub-themes constructed in the process of data analysis. The

203 study examined run streakers who had been engaging in a long-term run streak whose streak

204 'broke'. A key underpinning theme that emerged when examining the experiences of long-term

205 streaks ending which permeated subsequent themes and sub-themes identified was the notion of  
206 the streak becoming ‘a thing’ in many runners. Rather than being perceived as a change strategy  
207 one uses to support running behaviour, or as a grammatical noun adjunct (‘run streak’), runners  
208 behaved as if the streak itself was a separate external ‘thing’, which in some cases exhibited  
209 properties of living organisms. This ‘biomorphism of streaking’ was reflected in the language  
210 used around streaking, including expressions such as ‘*keeping the streak alive*’, ‘*streak saver*’. ‘*a*  
211 *streak breaking/ snapping/ dying*’ or ‘*losing a streak*’. The runner and their streak, over time,  
212 develop a relationship, whereby the continued investment in the streak by the runner helps the  
213 streak to continue existing and growing in size or age, and the streak in turn helps the runner  
214 fulfil their own unique needs such as engaging in physical activity or attaining a sense of daily  
215 achievement. The sub-themes in relation to the three temporal phases of long-term streak  
216 cessation (i.e., lead up period, immediate consequences, and longer-term consequences) were  
217 then developed based on the notion of the streak as a (living) thing.  
218 The lead-up period related sub-themes were developed under the heading of ‘*the break-up*  
219 *process*’ and included two sub-themes: ‘*streak stutters*’ and ‘*prolonged ending*’. The immediate  
220 consequences related sub-themes were developed under the heading of ‘*the aftermath*’ and  
221 included two sub-themes: ‘*emotional cocktail*’ and ‘*reflexive rebound intentions*’. The longer-  
222 term consequences were developed under the heading of ‘*the adaptations*’ and included three  
223 sub-themes: ‘*grief*’, ‘*return to running*’, and ‘*life lessons learnt*’.

224

225 --- Figure 1 about here please ---

226

227

228 ***The Break-up Process***

229 In the lead up period to streak cessation, most runners outlined undergoing a process where the  
230 attitude towards their streak changed which ultimately led to the ending of their streak. The two  
231 sub-themes identified were: ‘*streak stutters*’ and ‘*prolonging of ending*’.

232

233 *Streak stutters*

234 ‘*Streak stutters*’ refer to the repeated experience of inconveniences in the maintenance of run  
235 streaking. The run streak had the potential to induce physical strain, social conflict, and cognitive  
236 burden in the streak runner. The degree to which a runner perceived their streak to be an  
237 inconvenience was variable. Some reported minor stress associated with their streak, which were  
238 seen as manageable and did not interfere with streak maintenance.

239 *“I wouldn’t say it was a burden. There is usually one single day, a single event [that feels*  
240 *like a burden], and then for the next three months, no burden at all, and then another*  
241 *single event that I would have to work around.”* Participant 15, Male.

242 Some described periods of inconvenience and burden when maintaining their run streak. When  
243 runners’ goals changed or were no longer being met, streak maintenance shifted from an overall  
244 enjoyable experience to one filled with burden.

245 *“If [the streak] got to feel like a daily chore, then it defeated the purpose of trying to be*  
246 *fitter. It devolved into just sort of going out and doing the minimum so that I could*  
247 *maintain the streak. It was no longer achieving the objective that I’d set out for myself.”*

248 Participant 12, Male.

249 During periods of streak stuttering where run streaking was not perceived as seamless and  
250 enjoyable, runners often reported reflecting on the purpose of their run streaking. These

251 reflections and adverse experiences of run streaking took part whilst still practicing the daily  
252 running.

253 *“Mentally, you can be extremely tired, worn out, and it can be wearing on you. Why am I*  
254 *doing this? [...] Why do I keep doing this?”* Participant 1, Male.

255

256 *Prolonged Ending*

257 ‘*Prolonged ending*’ refers to runners engaging in streak extension measures to avoid or delay  
258 streak cessation for as long as possible. The period of prolonged ending typically started  
259 following the experience of streak stutters which became more frequent or more intense over  
260 time, typically though injury or medical conditions unrelated to running. Runners frequently  
261 reported a continuation of running despite pain and were inclined to ‘*run through injury*’ to  
262 trying and maintain their streak.

263 *“I certainly ran through some things that I would have normally taken a break for just*  
264 *because I wanted to keep my streak going”.* Participant 6, Other Gender.

265 Multiple runners reported injuries attained through running that were not given time to heal  
266 because of one’s persistence in the streak.

267 *“Sometimes you can keep running when you have a bad injury and you say, ‘well, I’ll just*  
268 *run through it, I’ll just gut it out’, and you can do damage that makes it harder to heal*  
269 *from that injury or prolong the recovery of that injury.”* Participant 1, Male.

270 In addition to acute injuries attained through running, runners highlighted the long-term ‘wear  
271 and tear’ that their body experienced and age-related physical decline. Despite pain, runners  
272 remained dedicated to the continuation of their streak and there was a degree of normalization of  
273 injury for some runners experiencing persistent pain.

274 *“I literally hurt all the time, every day something different hurts a little bit and I feel like*  
275 *that’s going to be unavoidable [when streaking].”* Participant 8, Male.

276 The prolonged ending period was often characterised by streak care behaviours (i.e., use of  
277 problem-oriented coping strategies) and goal-adjustment strategies such as reducing running  
278 intensity, time, or distance not leading to the desired outcomes anymore. When experiencing  
279 persistent periods of pain whilst continuing to engage in streak running, runners often reported  
280 engaging in a ‘streak saver’; a one-mile run, often completed at a slower than normal pace, solely  
281 done with the intention of ‘keeping the streak alive’. Rather than ending a streak when  
282 experiencing pain (i.e. avoidance behaviour), runners practiced pain endurance and engaged in  
283 ‘streak savers’ (i.e. running the minimum distance of one mile), to prolong the end of the streak.

284 *“And I’m almost in tears. I’m like I can’t do this anymore, I just can’t. Like I can not do*  
285 *this physically anymore, it was like a month of painful one-milers.”* Participant 11, Male.

286 When surgery was required for running-related injuries, the experienced pain could become  
287 strong enough to force cessation of the streak before a scheduled surgery.

288 *“At that point there was no way I was going to keep doing that to myself every day. It was*  
289 *pure agony basically, to go out and run.”* Participant 10, Male.

290 Some runners required surgery for non-running related reasons, and often reported the  
291 continuation of their streak up until the day of their scheduled surgery.

292 *“I ran everyday up until the day of my surgery... so I stayed up until midnight the night*  
293 *before my surgery, ran, and then went to bed, so I could get that one last day in before*  
294 *my surgery.”* Participant 17, Female.

295 The experience of a final run before a scheduled ending, was viewed by some runners as a  
296 moment to celebrate the accomplishment of their streak.

297            *“Well in my case it was kind of a celebratory run, that last run, because I knew it was the*  
298            *end of my streak”*. Participant 15, Male.

299 Others, however, felt more sadness in the run up to a scheduled streak ending and when  
300 executing what was known to be their final days of their streak.

301            *“So leading up to that, I actually got really sad and I kind of didn't give my last runs my*  
302            *all. I was just, I mean, I did, but I didn't. I just knew it was the end.”* Participant 9,  
303            Female.

304 Runners with a strong attachment to their streak often delayed the ending of their run streak  
305 compared to those with a less firm attachment. Greater individual attachment to a streak  
306 increased willingness of a runners to take measures to maintain their streak while enduring pain.

307            *“I couldn't go more than a mile or two and it would be like 10 or 11 minutes a mile*  
308            *because I was just in such pain... Just to sleep at night I had to take a ton of ibuprofen. I*  
309            *was in bed sleeping, it hurt. So I finally just you know, I finally after probably at least a*  
310            *month, maybe two months of this. That's how, a bit obsessive I was, but I finally went to*  
311            *the doctor.”* Participant 10, Male.

312 When engaging in cessation of a run streak, the degree of attachment to the streak made this  
313 process more or less difficult. When streaking was a well-established component of a person's  
314 identity and a part of their daily lives, 'letting go' of the streak became increasingly challenging.

315            *“I guess it becomes a part of you, like this is who I am. This is what I've done. I don't*  
316            *want to give it up now. It turned into I'm going to do it until I physically can't or, you*  
317            *know, there's a good reason not to.”* Participant 9, Female.

318 Consequently, when terminating a streak that a runner experienced an attachment to, the  
319 consequences were more severe than if attachment was low.

320           *“When I was on my first big one, I would post about it, I felt like maybe it became more*  
321           *of my personality than it should have been. And then in turn, when that one had to break,*  
322           *it was much harder for me because I made such a big deal out of it. So now, I’m on my*  
323           *third of a decent length and I’ve just, you know, it is what it is. I do it if I can.”*

324           Participant 14, Female.

325

### 326   ***The Aftermath***

327   During the period following cessation of long-term streaks runners reported feeling an immediate  
328   impact and most runners remembered and recalled this time clearly and in detail. The two sub-  
329   themes identified were: ‘*emotional cocktail*’, and ‘*reflexive rebound intentions*’.

330

#### 331           *Emotional cocktail*

332   Immediately after breaking a streak, many runners reported experiencing a multitude of emotions  
333   of higher and lower activation including ‘sadness’, ‘frustration’, and ‘anger’, often  
334   simultaneously or sequentially. Runners experiencing abrupt and unexpected endings to their  
335   streak, due to reasons such as sickness or injury, reported the emergence of emotions almost  
336   immediately after ending their streak. Often the ending of the streak was experienced within an  
337   already adverse context such as during periods of pain, injury or health problems, leading to  
338   runners experiencing a ‘double downer’ of a broken streak and having to deal with other  
339   additional issues. When runners were forced to end their streak because of an upcoming surgery  
340   or medical event, they often dealt with emotions such as sadness upon receiving the news of the  
341   inevitable ending of their streak.

342           *“I think it was harder the day I found out I couldn’t run. Like when I had the consultation*  
343           *with the surgeon, I remember calling my husband after I had the appointment and just*  
344           *like crying on the phone because I was really upset [about losing the streak]”.*

345           Participant 17, Female.

346           Runners also reported emotions such as anger when recalling the end of their run streak. Anger  
347           was often directed at the individual themselves.

348           *“Oh my gosh, I was so mad at myself for letting that happen.”* Participant 13, Female.

349           The most common emotion associated with ending a streak that was reported by individuals was  
350           disappointment.

351           *“I felt disappointed immediately, right away.”* Participant 3, Female.

352           Intensity of these feelings were related to streak attachment. The greater the attachment to the  
353           streak, the more intense the emotional response seemed to be. In some instances, the ending of a  
354           streak provoked an emotional response wherein the runner cried.

355           *“So I just called my wife, a bit tearfully honestly, I said, you know, I just, I can’t do it*  
356           *anymore, I have to realize it’s over.”* Participant 10, Male.

357           Consequently, runners who were less attached to their streak experienced less intense emotions  
358           than those with greater attachment.

359           *“I did not cry myself to sleep or anything like that. It was mildly disappointing, but it*  
360           *wasn’t a huge, big, catastrophic disaster to me.”* Participant 5, Female.

361           Not all participants reported feelings of distress or recounted emotional states upon the breaking  
362           of their long-term streak. Some runners reported feeling at ease when their run streak ended.

363           *“I put a lot of pressure on myself during the first streak and I was relieved that it was*  
364           *over.”* Participant 17, Female.



365 When runners felt burdened by their streak and experienced ‘streak stutters’ for a period of time,  
366 streak cessation could bring feelings of relief.

367 *“It was also a relief. I was glad to not have to get up every day and run.”* Participant 9,  
368 Female.

369 Feelings of relief often did not exist in isolation. When runners reported feeling relieved upon  
370 streak cessation, it was often reported in combination with contrasting emotions.

371 *“It was a little bit of a relief and a little bit of a let down at the same time. You’re just kind*  
372 *of like, you know, finally I can give my body a break. But at the same time, it’s like,*  
373 *you’ve gone 366 days like and then in one day you can just start the clock back from one*  
374 *if you decide to do it again.”* Participant 6, Other Gender.

375

376 *Reflexive rebound intentions*

377 Following streak cessation, runners reported various stances on their intents for future streaking.  
378 Most runners reported that directly following streak cessation, they intended to start another  
379 streak as soon as physically possible.

380 *“But I also knew in my mind that I’d streak again. You know, that I’d get back up on that*  
381 *horse that threw me off.”* Participant 1, Male.

382 An immediate intention to streak again was reported to serve as a method of coping with the end  
383 of a streak. When runners were confident in their ability to restart a streak after it ended, there  
384 seemed less emotion associated with its ending. A future-oriented perspective seemed to help  
385 runners deal with the ending of their streak, particularly for those who had previous experiences  
386 of ending long-term streaks in the past.

387            *“There’s a little sadness, but I’d already done it once before. I just knew for me, it’s kind*  
388            *of going to have to be my lifestyle. It just works for me. So if it stops, then when it’s ready*  
389            *to restart then we’ll just go again.”* Participant 14, Female.

390 For some, the initial intention to restart their streak was present after breaking their run streak but  
391 did not translate into action subsequently. The intention-behaviour gap was often justified by the  
392 enjoyment of ‘rest days’.

393            *“I sort of thought I might start another longer one and then just never did [...] I decided I*  
394            *like the days off.”* Participant 12, Male.

395

### 396 ***The Adaptations***

397 In the weeks and months after streak cessation, runners reported various personal impacts.  
398 Within the adaptations, three subthemes were identified: ‘grief’, ‘return to running’ and ‘life  
399 lessons learnt’.

400

#### 401 *Grief*

402 Many runners reported going through a series of emotional and behavioural responses after the  
403 loss of their run streak. Some runners described what they referred to as a ‘grieving process’  
404 where feelings of sadness and regret were experienced for a period of time.

405            *“There was a sense of maybe I should have just ran. I should have just ran that day. I*  
406            *could have done it. I should have done it.”* Participant 2, Male.

407 During the grieving process, runners reported receiving social emotional support from friends  
408 and family during the days and weeks following the end of their streak.

409 *[When recalling the days and weeks after termination of their streak] “So I had a ton of*  
410 *people just reaching out left and right.” Participant 9, Female.*

411 Over time, runners reported that the intensity of these feelings decreased, and they were able to  
412 become more accepting of the end of their streak.

413 *“It’s intense at first and it, it is kind of like a grieving process where you become more*  
414 *accepting of it over time.” Participant 4, Male.*

415 However, some runners reported the re-emergence of sadness and regret near what would have  
416 been a ‘streaking milestone’.

417 *“Sometimes I get a little sad that it’s over... I think about when we get to December 31<sup>st</sup>,*  
418 *when it would have been my 11 year anniversary, I think that will be kind of hard for me*  
419 *just because I’m like man, I could have kept on.” Participant 11, Male.*

420 Re-emergence of feelings of grief were also reported to occur when the runner was subjected to  
421 an environment in which they used to run streak. This was typically when runners seemed to  
422 have a strong streak attachment.

423 *“It [feelings post-streak] hasn’t completely gone away, especially like a beautiful fall*  
424 *day, [...], sunny, no wind, and I feel like geez I should just go out for a run.” Participant*  
425 *10, Male.*

426 Not all runners reported a grieving process, particularly those who were less attached to their  
427 streak, and when finding other non-running related goal to pursue during the time one would  
428 typically engage in running.

429 *“I adapted very quickly. After the injury [...], I didn’t run a step for 6 weeks. [...] I didn’t*  
430 *particularly miss it. I found other things to do.” Participant 5, Female.*

431 All three runners who voluntarily made the decision to end their streak in the absence of injury  
432 did not report experiencing a grieving process.

433 *“I expected regret and got none [...] It was fun. It was good. It was a fine number, but I*  
434 *moved on.”* Participant 12, Male.

435  
436 *Return to Running*

437 Following cessation of a run streak, all runners who were physically capable eventually  
438 undertook regular running as an ongoing behaviour. The time between the end of a streak and the  
439 initiation of running varied. For some, this length of time was reported to be short.

440 *“I think I was interrupted for two days. It might have been three, but it was no more than*  
441 *three. Right back into it.”* Participant 16, Male.

442 Other runners reported larger gaps in running behaviour following streak cessation.

443 *“It was about a year and two months that I went between the first week and then starting*  
444 *the second one. And I don’t think I really ran once in that time.”* Participant 17, Female.

445 Although all physically capable runners began running regularly, seven opted not to initiate  
446 another run streak. Reasons for not re-engaging with run streaking included pursuing different  
447 goals, including running and non-running related ones.

448 *“No, I would consider it [starting another run streak], I think mostly I just have other life*  
449 *plans and other interests.”*, Participant 7, male.

450 Runners who did not begin another streak also reported benefits of regular rests from an injury  
451 perspective and the enjoyment of having increased flexibility with their time and schedule.

452 *“I’m enjoying the freedom of not being burdened of having to do it every day.”*  
453 Participant 15, Male.

454 However, most runners reported the initiation of a subsequent run streak following cessation of  
455 the previous one.

456 *“I did know that I liked doing that and as soon as I was able to, I started another streak*  
457 *and got to where I am now.”* Participant 4, Male.

458 The decision to streak again was a personalized choice. However, an individual’s ‘love for  
459 running’ and their sense of identity associated with run streaking were common reasons for the  
460 decision to start another run streak.

461 *“Running had become a very important part of who I am. It became like an identity thing.*  
462 *And being a streak runner became an identity thing, so I knew at some point I was gonna*  
463 *get back into it.”* Participant 2, Male.

464 In beginning another run streak, it was common for runners to reinitiate running by engaging in  
465 the behaviour a few times a week before starting another streak.

466 *“So three months later is when I started running again. So I didn’t necessarily start*  
467 *streaking again. I think I’d been running two or three or four weeks before I started a*  
468 *streak again.”* Participant 4, Male.

469  
470 *Life lessons learnt*

471 Several runners reported that run streaking made them better equipped to deal with adversity in  
472 other areas of their lives. Common lessons reported by streak runners who had ended a streak  
473 were characterized by concepts such as ‘grit’ and ‘mental strength’.

474 *“I learnt a lot about myself and like pushing my limits as far as like, the brain is stronger*  
475 *than the body.”* Participant 11, Male.

476 Some runners reported learning about their own personal limits, concluding that they perceived  
477 themselves as more capable than they had previously thought.

478 *“You learn a lot about mental strength. Because doing a run streak, training for races,*  
479 *you’re pushing yourself beyond what you’ve done before. When you get to the other side*  
480 *of that, you really understand that your boundaries aren’t always where you thought they*  
481 *were.”* Participant 6, Other Gender.

482 For some, run streaking was a source of self-efficacy. Runners found confidence in their own  
483 abilities through run streaking.

484 *[When asked about lessons learnt from run streaking]* *“You can do a lot more than you*  
485 *ever thought you could. If you put your mind to it, you can do things that you never*  
486 *imagined you could do.”* Participant 16, Male.

487

## 488 **DISCUSSION**

### 489 ***Principal findings***

490 Streak runners who ended a long-term run streak reported experiencing some unintended  
491 negative consequences of run streak cessation. Prior to streak cessation, many runners continued  
492 running for long periods despite injury. Streak runners were often willing to endure adverse  
493 consequences (e.g., pain) for long periods of time to maintain their run streak. Immediately  
494 following run streak cessation, runners reported a variety of affective responses including  
495 sadness, anger, disappointment, or relief. The intensity of responses seemed related to the level  
496 of streak attachment. Following streak cessation, many runners reported an immediate intention  
497 to streak again, often to cope with and to compensate for the loss of a previous streak. Ongoing  
498 and persistent feelings of grief following streak cessation were reported by some runners with

499 stronger streak attachment and stalker identity. Despite some perceived negative consequences  
500 prior to and after streak cessation, no long-term negative consequences of streaking were  
501 observed in this study. Positive long-term effects included the maintenance of regular running  
502 behaviour following streak cessation, regardless of whether runners began streaking again. Most  
503 physically capable runners re-engaged in run streaking, with others engaged in running  
504 approximately 3-4 days per week. Most runners reported that run streaking taught them lessons  
505 about mental strength, grit, and pushing their limits. Several runners indicated that run streaking  
506 made them more capable to deal with adversity in various aspects of their lives. No runners  
507 reported regretting having engaged in long-term run streaking and all runners reported an overall  
508 net positive experience of streak running.

509

### 510 *Strengths and weaknesses of the study*

511 Few studies examine the backfire potential of engaging in BCTs (27). This study provides an in-  
512 depth examination of the potential negative consequences of engaging in long-term run streaking  
513 in individuals whose long-term streak ended, with most runners reporting involuntary streak  
514 cessation. This study includes a population that demonstrates long-term engagement in a health  
515 behaviour using a specific BCT, which is rare. Focusing on runners who ended a long-term run  
516 streak of  $\geq 100$  days ensures that this study examines a population that is most likely to have  
517 experienced unintended negative consequences of the use of run streaking. When interpreting the  
518 findings it should be noted that most runners were from North American, Caucasian, and only  
519 one participant fell into the 20–29-year-old age group. Moreover, accounts of streak cessation  
520 were provided in retrospect, and the accuracy of participant accounts may be skewed over time.

521

522 *Interpretation of findings and relation to other studies*

523 Long-term streaking may lead runners to develop a relationship with their streak as if it is a  
524 (living) thing. Consequently, the streak needs to be ‘kept alive’ and requires care and attention so  
525 that the streak does not die. Ongoing investment of energy into streak maintenance can lead to  
526 runners developing an attachment to their streak over time. The need to invest time and effort  
527 into the streak, and its ability to grow and age likely contributes to its biomorphized and  
528 (sometimes anthropomorphized) conceptualisation. In this state, the cessation of the streak  
529 constitutes not just an absence of behaviour, but a loss of a relationship with a (living) thing.  
530 Initial evidence of the backfiring potential of using streaking as a BCT were highlighted in a  
531 study examining the experience of run streaking in recreational runners (26). The findings  
532 suggested that streaking can lead to lack of recovery, stress-inducement, and negative affective  
533 states when streaks break (26). The current study on runners ended a long-term run streak  
534 support these findings. Potential unintended negative consequences reported by some runners in  
535 the current study included a willingness to run with injury and endure pain while engaging in  
536 streaking. In the context of the avoidance-endurance model of pain (32), streak runners can be  
537 viewed as engaging in task persistence behaviours (e.g., running through injury) which carry the  
538 risk of pain chronification (33). As another unintended consequence, streak runners reported  
539 experiences such as sadness, anger, disappointment, regret and grief following streak cessation.  
540 These reports were not uniform and differed across streak runners. No evidence of long-term  
541 negative psychological consequences associated with run streaking were found.  
542 Excessive engagement in running has raised questions of a potential upper threshold for health  
543 and longevity benefits of this behaviour (7). Some studies suggest that excessive running, may  
544 cause adverse effects on cardiac structure and function (34). However, results from a



545 longitudinal study (n=55,137) comparing weekly running time and death rates showed no  
546 increased risk of all-cause mortality even in the highest running groups and suggests that  
547 insufficient evidence exists to conclude whether large amounts of running have adverse health  
548 consequences.(7).

549 In the self-enactable compendium (21), BCTs were supplemented with their associated potential  
550 ‘possible adverse effects’ based on expert review of each of the techniques. Adverse effects such  
551 as ‘possible addiction’ (#62 pharmacological support) or feelings of unpleasantness and stress  
552 (#91 self-disincentive) were flagged when BCTs were used an inappropriate manner. The  
553 compendium highlights the need for a deeper analysis of BCT backfire potential and strategies to  
554 combat the negative consequences of BCT use. The current study provides information on the  
555 drawback effects and backfire potential of run streaking as a BCT.

556 The importance of learning from behaviour change interventions which have unintended  
557 negative consequences is often overlooked (35). Osman et al. (2020) proposed a taxonomy of  
558 failures of behavioural change examining conditions under which behaviour change techniques  
559 might lead to backfiring effects. Out of the eight potential types of failures listed in the  
560 taxonomy, the current research aligns with ‘treatment offset by negative side effects’. Within this  
561 category, the target behaviour of an intervention is achieved, however it coexists with negative  
562 consequences. In the context of ‘naturally occurring’ run streaking, the target behaviour (daily  
563 running) may be attained, however the unintended negative consequences (e.g., injury, risk of  
564 pain chronification) have the potential to outweigh the positive effects, demonstrated by for  
565 example runners’ reports of streak inconveniences. When the negative consequences become too  
566 great behavioural disengagement followed. However, the current study demonstrate that the  
567 unintended negative consequences of run streaking were often not sufficient for the behaviour to

568 be abandoned voluntarily for prolonged periods of time. Moreover, the most prominent  
569 unintended negative consequences were often reported following run streak cessation. Side  
570 effects of discontinued BCT use included sadness, anger, disappointment, and grief. When  
571 individuals were no longer able to engage in the target behaviour of running every day, they  
572 experienced negative psychological consequences. However, regardless of negative  
573 consequences during and after engaging in run streaking, runners reported an overall net positive  
574 experience of streak running.

575

### 576 *Implications and future research*

577 Few instances of voluntary cessation were examined in the current study, where three out of 17  
578 runners voluntarily ended their run streak. Thus, whether there is a difference in the impacts of  
579 unintentional compared to voluntary streak cessation could not be examined. The three runners  
580 engaging in voluntary streak cessation reported minimal unintended negative consequences.  
581 However, further research on voluntary streak cessation is required.  
582 This study found that runners with a high level of streak attachment had high levels of  
583 psychosocial unintended negative consequences following streak cessation. Future research  
584 might focus on examining individual differences in the level of streak attachment and the  
585 underlying motives for engaging in streak running as potential explanatory factors for differential  
586 perceived consequences of streak run cessation.  
587 Additional questions of who might benefit from streaking remain. This study demonstrated that  
588 unintended negative consequences when run streaking were not uniform across participants.  
589 Future research should examine whether the technique is more suitable for certain individuals  
590 with different personality characteristics (e.g., openness, conscientiousness) or living contexts.

591 Streaking as a BCT has the potential to influence other behaviour related cognitions and  
592 behaviours. A previous study noted ‘streaking spillover’ of using the technique to other areas of  
593 life (26). The current study confirmed these findings in streak runners who ended a long-term  
594 streak. Future research would benefit from systematically examining streaking drawing on  
595 evidence and theory focused on multiple behaviour change (36).

596

### 597 *Conclusion*

598 Run streaking as a BCT has the potential to support long-term behaviour change like few other  
599 individual techniques. Runners become attached to their ever-growing run streak and  
600 consistently engaging in the behaviour to ‘keep the streak alive’. However, the aspects that  
601 contribute to streaking’s ability to support change also have the potential to cause adverse  
602 consequences such as inconvenience and a willingness to engage in pain endurance behaviours  
603 such as running through injury. Streak cessation can be associated with negative emotions which  
604 have the potential to develop into experiences of grief. The degree to which these factors  
605 impacted runners was variable and often associated with their level of streak attachment.  
606 Although, there were potential backfiring effects, streaking was generally a net positive  
607 experience for participants and seen as helpful in the maintenance of running behaviour. No  
608 long-term negative consequences were observed. Run streaking can be seen as a beneficial  
609 behaviour change technique to help individuals increase their health-related behaviours, when  
610 accounting for possible backfire effects.

611

612 **CONFLICTS OF INTEREST**

613 The authors declare no known conflicts of interest.

614

615 **DATA AVAILABILITY STATEMENT:**

616 The data that support the findings of this study are available from the corresponding author upon  
617 reasonable request.

618

619 **FUNDING**

620 This study received no external funding.

621

622 **ACKNOWLEDGEMENTS:**

623 The authors would like to thank all participants in the study.

624

625 **INSTITUTIONAL REVIEW BOARD STATEMENT**

626 The study was conducted in accordance with the Declaration of Helsinki and was approved by an  
627 Institutional Review Board/Ethics committee. See details under Methods.

628

## REFERENCES

- 629 1. Warburton DE, Nicol CW, Bredin SS. Health benefits of physical activity: the evidence.  
630 Canadian Medical Association Journal. 2006;174(6):801-9.
- 631 2. Posadzki P, Pieper D, Bajpai R, Makaruk H, Könsgen N, Neuhaus AL, et al.  
632 Exercise/physical activity and health outcomes: an overview of Cochrane systematic reviews.  
633 BMC Public Health. 2020;20:1-12.
- 634 3. Ross R, Chaput JP, Giangregorio LM, Janssen I, Saunders TJ, Kho ME, et al. Canadian  
635 24-Hour Movement Guidelines for Adults aged 18-64 years and Adults aged 65 years or older:  
636 an integration of physical activity, sedentary behaviour, and sleep. Applied Physiology,  
637 Nutrition, and Metabolism. 2020;45(10 (Suppl. 2)):S57-s102.
- 638 4. Clarke J, Colley R, Janssen I, Tremblay MS. Accelerometer-measured moderate-to-  
639 vigorous physical activity of Canadian adults, 2007 to 2017. Health Reports. 2019;30(8):3-10.
- 640 5. Chakravarty EF, Hubert HB, Lingala VB, Fries JF. Reduced disability and mortality  
641 among aging runners: a 21-year longitudinal study. Archives of Internal Medicine.  
642 2008;168(15):1638-46.
- 643 6. Pedisic Z, Shrestha N, Kovalchik S, Stamatakis E, Liangruenrom N, Grgic J, et al. Is  
644 running associated with a lower risk of all-cause, cardiovascular and cancer mortality, and is the  
645 more the better? A systematic review and meta-analysis. British Journal of Sports Medicine.  
646 2020;54(15):898-905.
- 647 7. Lee D-C, Pate RR, Lavie CJ, Sui X, Church TS, Blair SN. Leisure-time running reduces  
648 all-cause and cardiovascular mortality risk. Journal of the American College of Cardiology.  
649 2014;64(5):472-81.

- 650 8. Nezlek JB, Cypryńska M, Cypryński P, Chlebosz K, Jencylik K, Sztachańska J, et al.  
651 Within-person relationships between recreational running and psychological well-being. *Journal*  
652 *of Sport and Exercise Psychology*. 2018;40(3):146-52.
- 653 9. Bertelsen ML, Hulme A, Petersen J, Brund RK, Sørensen H, Finch CF, et al. A  
654 framework for the etiology of running-related injuries. *Scandinavian Journal of Medicine &*  
655 *Science in Sports*. 2017;27(11):1170-80.
- 656 10. Fokkema T, Hartgens F, Kluitenberg B, Verhagen E, Backx FJG, van der Worp H, et al.  
657 Reasons and predictors of discontinuation of running after a running program for novice runners.  
658 *Journal of Science and Medicine in Sport*. 2019;22(1):106-11.
- 659 11. Pereira HV, Palmeira AL, Encantado J, Marques MM, Santos I, Carraça EV, et al.  
660 Systematic review of psychological and behavioral correlates of recreational running. *Frontiers*  
661 *in Psychology*. 2021:1162.
- 662 12. McCormick A, Pedmanson P, Jane B, Watson P. How do new runners maintain their  
663 running, and what leads to others stopping? A qualitative, longitudinal study. *Psychology of*  
664 *Sport and Exercise*. 2024;70:102515.
- 665 13. Kwasnicka D, Dombrowski SU, White M, Sniehotta F. Theoretical explanations for  
666 maintenance of behaviour change: a systematic review of behaviour theories. *Health Psychology*  
667 *Review*. 2016;10(3):277-96.
- 668 14. Wood W, Rüniger D. Psychology of habit. *Annual Review of Psychology*. 2016;67:289-  
669 314.
- 670 15. Lally P, van Jaarsveld CHM, Potts HWW, Wardle J. How are habits formed: Modelling  
671 habit formation in the real world. *European Journal of Social Psychology*. 2010;40(6):998-1009.

- 672 16. Lally P, Gardner B. Promoting habit formation. *Health Psychology Review*.  
673 2013;7(sup1):S137-S58.
- 674 17. Keller J, Kwasnicka D, Klaiber P, Sichert L, Lally P, Fleig L. Habit formation following  
675 routine-based versus time-based cue planning: A randomized controlled trial. *British Journal of*  
676 *Health Psychology*. 2021;26(3):807-24.
- 677 18. Weathers D, Poehlman TA. Defining, and understanding commitment to, activity streaks.  
678 *Journal of the Academy of Marketing Science*. 2024;52(2):531-53.
- 679 19. Silverman J, Barasch A. On or off track: How (broken) streaks affect consumer decisions.  
680 *Journal of Consumer Research*. 2023;49(6):1095-117.
- 681 20. Silverman J, Barasch AP, Small DA. Hot streak! Inferences and predictions about goal  
682 adherence. *Organizational Behavior and Human Decision Processes*. 2023;179:104281.
- 683 21. Knittle K, Heino M, Marques MM, Stenius M, Beattie M, Ehbrecht F, et al. The  
684 compendium of self-enactable techniques to change and self-manage motivation and behaviour  
685 v. 1.0. *Nature Human Behaviour*. 2020;4(2):215-23.
- 686 22. Kok G, Gottlieb NH, Peters G-JY, Mullen PD, Parcel GS, Ruiters RA, et al. A taxonomy  
687 of behaviour change methods: an intervention mapping approach. *Health Psychology Review*.  
688 2016;10(3):297-312.
- 689 23. Michie S, Ashford S, Sniehotta FF, Dombrowski SU, Bishop A, French DP. A refined  
690 taxonomy of behaviour change techniques to help people change their physical activity and  
691 healthy eating behaviours: the CALO-RE taxonomy. *Psychology & Health*. 2011;26(11):1479-  
692 98.
- 693 24. Michie S, Richardson M, Johnston M, Abraham C, Francis J, Hardeman W, et al. The  
694 behavior change technique taxonomy (v1) of 93 hierarchically clustered techniques: building an

- 695 international consensus for the reporting of behavior change interventions. *Annals of Behavioral*  
696 *Medicine*. 2013;46(1):81-95.
- 697 25. Barraclough A. The rise of the run streak 2023 [Available from:  
698 <https://www.runnersworld.com/uk/training/motivation/a772215/the-rise-of-the-run-streak/>].
- 699 26. Curran M, Larade N, Özakinci G, Tymowski-Gionet G, Dombrowski SU. Look, over  
700 there! A streaker! – Qualitative study examining streaking as a behaviour change technique for  
701 habit formation in recreational runners. *Health Psychology and Behavioral Medicine*.  
702 2024;12(1):2416505.
- 703 27. Stibe A, Cugelman B, editors. *Persuasive backfiring: When behavior change*  
704 *interventions trigger unintended negative outcomes*. *Persuasive Technology: 11th International*  
705 *Conference, PERSUASIVE 2016, Salzburg, Austria, April 5-7, 2016, Proceedings 11*; 2016:  
706 Springer.
- 707 28. Pan C-C, Urban M, Schüz B. Unintended consequences of digital behavior change  
708 interventions: A social–ecological perspective. *European Journal of Health Psychology*.  
709 2024;31(3):141-9.
- 710 29. Jan MS, Renke LB, Ani M, Kathryn O, Eva AR. Development of an overarching  
711 framework for anticipating and assessing adverse and other unintended consequences of public  
712 health interventions (CONSEQUENT): a best-fit framework synthesis. *BMJ Public Health*.  
713 2024;2(1):e000209.
- 714 30. Clarke V, Braun V. Thematic analysis. *The Journal of Positive Psychology*.  
715 2017;12(3):297-8.



- 716 31. Fereday J, Muir-Cochrane E. Demonstrating rigor using thematic analysis: A hybrid  
717 approach of inductive and deductive coding and theme development. *International Journal of*  
718 *Qualitative Methods*. 2006;5(1):80-92.
- 719 32. Hasenbring MI, Chehadi O, Titze C, Kreddig N. Fear and anxiety in the transition from  
720 acute to chronic pain: there is evidence for endurance besides avoidance. *Pain Management*  
721 2014;4(5):363-74.
- 722 33. Hasenbring MI, Verbunt JA. Fear-avoidance and Endurance-related Responses to Pain:  
723 New Models of Behavior and Their Consequences for Clinical Practice. *The Clinical Journal of*  
724 *Pain*. 2010;26(9).
- 725 34. Lavie CJ, Arena R, Swift DL, Johannsen NM, Sui X, Lee DC, et al. Exercise and the  
726 cardiovascular system: clinical science and cardiovascular outcomes. *Circulation Research*.  
727 2015;117(2):207-19.
- 728 35. Osman M, McLachlan S, Fenton N, Neil M, Löfstedt R, Meder B. Learning from  
729 Behavioural Changes That Fail. *Trends in Cognitive Sciences*. 2020;24(12):969-80.
- 730 36. Fleig L, Radtke T, Dombrowski SU. Understanding Multiple Health Behaviours. *The*  
731 *Routledge International Handbook of Health Psychology*. 1. 1 ed: Routledge; 2025.

733 **Table 1: Participant demographics**

| <b>ID</b> | <b>Age Range (years)</b> | <b>Running experience (years)</b> | <b>Broken streak length (days)</b> | <b>Gender</b> | <b>BMI Category</b> | <b>Marital Status</b> | <b>Country</b> | <b>Ethnicity</b> | <b>Employment Status</b> |
|-----------|--------------------------|-----------------------------------|------------------------------------|---------------|---------------------|-----------------------|----------------|------------------|--------------------------|
| 1         | 60-69                    | 21-30                             | 501-1000                           | M             | 25.0-29.9           | Married               | USA            | White            | Retired                  |
| 2         | 50-59                    | 11-15                             | 1001-2000                          | M             | 25.0-29.9           | Married               | USA            | White            | Employed                 |
| 3         | 30-39                    | 5-10                              | 501-1000                           | F             | 18.5-24.9           | Partnership           | Canada         | Chinese          | Employed                 |
| 4         | 60-69                    | 21-30                             | 501-1000                           | M             | 25.0-29.9           | Single                | USA            | White            | Employed                 |
| 5         | 60-69                    | 21-30                             | 1001-2000                          | F             | 18.5-24.9           | Partnership           | Scotland       | White            | Employed                 |
| 6         | 40-49                    | 16-20                             | 366-500                            | O             | 18.5-24.9           | Single                | Canada         | White            | Employed                 |
| 7         | 40-49                    | 11-15                             | 100-365                            | M             | 25.0-29.9           | Partnership           | Canada         | White            | Employed                 |
| 8         | 30-39                    | 5-10                              | 100-365                            | M             | 18.5-24.9           | Single                | Canada         | White            | Employed                 |
| 9         | 40-49                    | 16-20                             | 1001-2000                          | F             | 18.5-24.9           | Married               | USA            | White            | Employed                 |
| 10        | 60-69                    | 40+                               | 5000+                              | M             | 18.5-24.9           | Married               | USA            | White            | Retired                  |
| 11        | 40-49                    | 16-20                             | 3001-5000                          | M             | 25.0-29.9           | Married               | USA            | White            | Employed                 |
| 12        | 50-59                    | 40+                               | 1001-2000                          | M             | 18.5-24.9           | Married               | Canada         | White            | Employed                 |
| 13        | 20-29                    | 5-10                              | 501-1000                           | F             | 25.0-29.9           | Married               | USA            | White            | Employed                 |
| 14        | 40-49                    | 16-20                             | No data                            | F             | 18.5-24.9           | Married               | USA            | White            | Unemployed               |
| 15        | 70-79                    | 40+                               | 2001-3000                          | M             | 18.5-24.9           | Married               | USA            | White            | Retired                  |
| 16        | 70-79                    | 40+                               | 366-500                            | M             | 18.5-24.9           | Married               | USA            | White            | Retired                  |
| 17        | 40-49                    | 11-15                             | 1001-2000                          | F             | 30.0+               | Married               | USA            | White            | Employed                 |

734 Note: BMI= Body Mass Index (kg/m<sup>2</sup>), M= Male, F= Female, O = other gender (not disclosed to preserve anonymity).

735

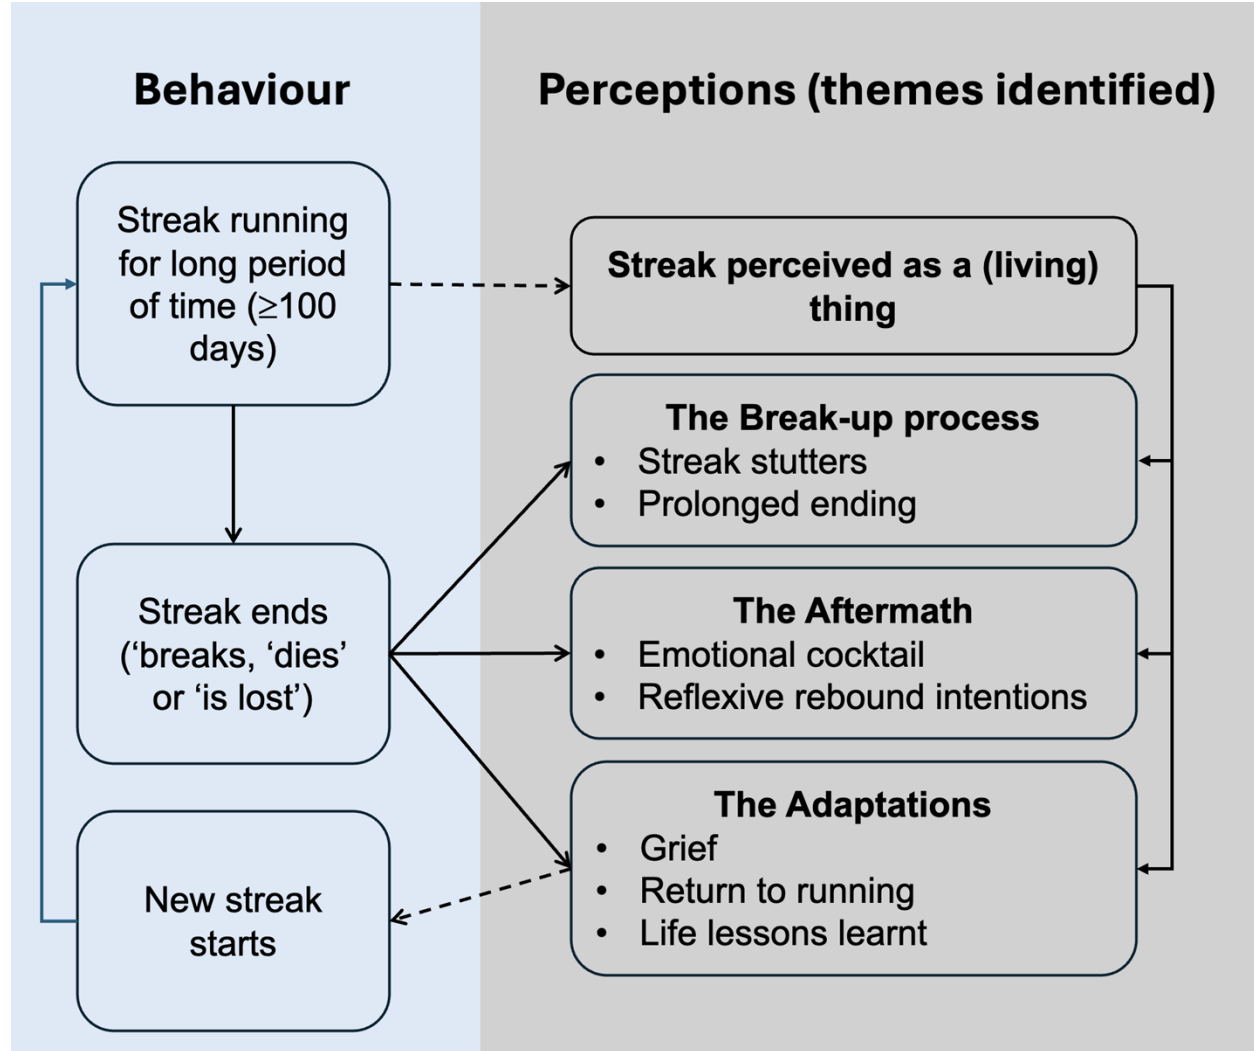

736

737 **Figure 1.** Framework depicting themes and corresponding sub-themes associated with long-term

738 streak cessation.

739  
740  
741  
742  
743  
744  
745  
746  
747  
748  
749  
750  
751  
752  
753  
754  
755  
756  
757  
758  
759  
760  
761  
762  
763

## Appendix A - Topic Guide

### **Part 1: Running and streaking in general**

Let's start with some questions about your running in general and your streak running.

**1. For how long have you been running overall, not just run streaking?**

**2. Besides running, do you do any other types of physical activity at the moment?**

- a. Have you always been running as an activity, or have you done other types of activity in the past?

**3. For run streaking specifically, how long have you been doing it?**

- a. Are you currently still streaking?
- b. [If still streaking] What was your longest ever streak? Is that your current streak?

**4. How did you get into run streaking?**

- a. Was it planned or accidental?

**5. Do you think run streaking is a useful strategy for everyone who want to be physically active?**

- a. If so, why and for whom?

**6. What are some of the positives of run streaking?**

- a. Routine
- b. Accomplishment
- c. Community
- d. Fitness

**7. What might be some of the negatives of run streaking?**

- a. Injury
- b. Impact on social life
- c. Stress
- d. Time and energy

764 e. Costs of equipment

765

766 **8. How did you cope with some of the negative consequences of streaking?**

767 **9. Were there times where you felt like you were obsessed with your streak?**

768 **10. Did maintaining your streak ever feel like a burden?**

769

## 770 **Part 2: Streak breaking or retiring the streak**

771 In this second part I would like to ask you a few questions about the time when you stopped your run

772 streak. Here I am interested in the last streak that stopped which was longer than 100 days?

773 **11. Did you stop your streak intentionally or was it not intentional?**

774 a. *If intentional*: What led you to this decision? Was this a sudden decision, or was it a  
775 process?

776 b. *If non-intentional*: What was the reason why had to stop?

777 i. Injury or surgery, Life event, Job or family commitment

778 **12. Can you remember the actual day that your streak stopped?**

779 a. [If yes] Could you tell me about what happened that day?

780 **13. How did you feel after your streak stopped?**

781 a. The next day, weeks, month

782 **14. How did your life change after stopping your streak?**

783 a. What was your relationship with physical activity like?

784 b. What did you do with your free time?

785 c. How did it affect your social life?

786 **15. Did you continue to run after your streak ended?**

787 a. [If yes] When did you start again? How frequently did you run?

788 b. [If no] Did you do any other type of physical activity instead?

789 **16. Did you start another streak? Why/why not?**

790 a. [If yes] When did you decide that you will start another streak? How much time was there  
791 between the end of streak and the beginning of your next streak?

792 **17. What lessons have you learnt from run streaking?**

793 a. About yourself, physical activity, accomplishing goals

794 **18. What else you would like to tell us about streaking that we haven't asked about?**

795 Thank you for answering all my questions. We really appreciate you participating in this research study.

796 Finally, I would like to ask you some brief questions about yourself.

797 **19. Demographic Questions.**

798 a. How old are you?

799 b. How would you describe your gender?

800 c. What is your relationship status?

801 d. Height/ Weight?

802 e. How would you describe your ethnicity?

803 f. What is your employment status?
